# Supplementary material for: An electrochemical biosensor for simultaneous detection of breast cancer clinically related microRNAs based on a gold nanoparticles/graphene quantum dots/graphene oxide film
Source: Royal Society of Chemistry journal article supplement (doi:10.1039/d1an00436k), 2021-01-01
Supplement: d1an00436k1.pdf [file d1an00436k1.pdf]

*Electronic supplement Information (ESI)*

**Electrochemical Biosensor for Simultaneous Detection of Breast Cancer  
Clinically Related MicroRNAs Based on a Gold Nanoparticles/Graphene  
Quantum Dots/ Graphene Oxide Film**

Chammari Pothipor,<sup>1,2,3</sup> Jaron Jakmunee,<sup>1,3,5</sup> Suwussa Bamrungsap,<sup>4</sup> Kontad Ounnunkad<sup>1,3,5,6\*</sup>

<sup>1</sup>*Department of Chemistry, Faculty of Science, Chiang Mai University, Chiang Mai 50200, Thailand*

<sup>2</sup>*The Graduate School, Chiang Mai University, Chiang Mai, 50200, Thailand*

<sup>3</sup>*Center of Excellence for Innovation in Chemistry, Faculty of Science, Chiang Mai University, Chiang Mai, 50200, Thailand*

<sup>4</sup>*National Nanotechnology Center (NANOTEC), National Science and Technology Development Agency (NSTDA), Pathum Thani 12120, Thailand*

<sup>5</sup>*Research Center on Chemistry for Development of Health Promoting Products from Northern Resources, Chiang Mai University, Chiang Mai, 50200, Thailand*

<sup>6</sup>*Center of Excellence in Materials Science and Technology, Chiang Mai University, Chiang Mai 50200, Thailand*

\*Corresponding author

Emails: [suriyacmu@yahoo.com](mailto:suriyacmu@yahoo.com), [kontad.ounnunkad@cmu.ac.th](mailto:kontad.ounnunkad@cmu.ac.th)

**Table S1 Table S1** The sequences of capture miRNA probes, miRNAs target, single-base mismatch (1MM), triple-base mismatch (3MM), and non-complementary miRNAs

| Probes and miRNAs           | Sequence                                                |
|-----------------------------|---------------------------------------------------------|
| Capture miRNA-21            | 5'-UCAACAUCAGUCUGAUAAGCUAUUU-SH-3'                      |
| Capture miRNA-155           | 5'-SH-CCCCUAUCACGAUUAGCAUAAA-3'                         |
| Capture miRNA-210           | 5'-SH-UCAGCCGUUGUCACACGCACAG-3'                         |
| miRNA-21                    | 5'-UAGCUUAAACAGACUGAUGUUGA-3'                           |
| 1MM miRNA-21                | 5'-UAGCUUAAUC <u>GG</u> ACUGAUGUUGA-3'                  |
| 3MM miRNA-21                | 5'-UU <u>GC</u> UUAUC <u>GG</u> ACUGAU <u>CU</u> UGA-3' |
| Non-complementary miRNA-21  | 5'- <u>G</u> UAAUGCAUCUGAC <u>CGAAGGCA</u> -3'          |
| miRNA-155                   | 5'-UUA <u>A</u> UUGC <u>UAA</u> UCGUGAUAGGGG-3'         |
| 1MM miRNA-155               | 5'-UUA <u>A</u> UGC <u>U</u> AUCGUGAUAGGGG-3'           |
| 3MM miRNA-155               | 5'-UUA <u>A</u> UGC <u>U</u> AUCG <u>A</u> GAUACGGG-3'  |
| Non-complementary miRNA-155 | 5'- <u>ACUGCAUGAGAUUUUCCUCAU</u> -3'                    |
| miRNA-210                   | 5'-CUGUGCGUGUGACAACGGCUGA-3'                            |
| 1MM miRNA-210               | 5'-CUGUGCGU <u>A</u> UGACAACGGCUGA-3'                   |
| 3MM miRNA-210               | 5'-CUG <u>C</u> CGUGU <u>A</u> ACAACG <u>U</u> CUGA-3'  |
| Non-complementary miRNA-210 | 5'- <u>GCUC</u> AAUGUGAGUCCAAAUCAG-3'                   |

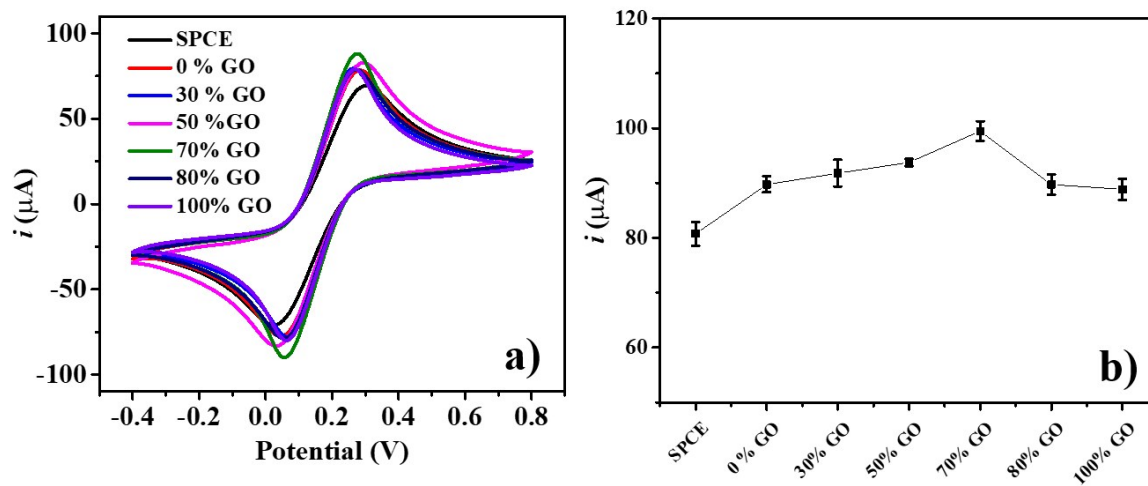

**Fig S1** Optimization of the GO/GQDs ratio of composite sitting on the surface of SPCE.

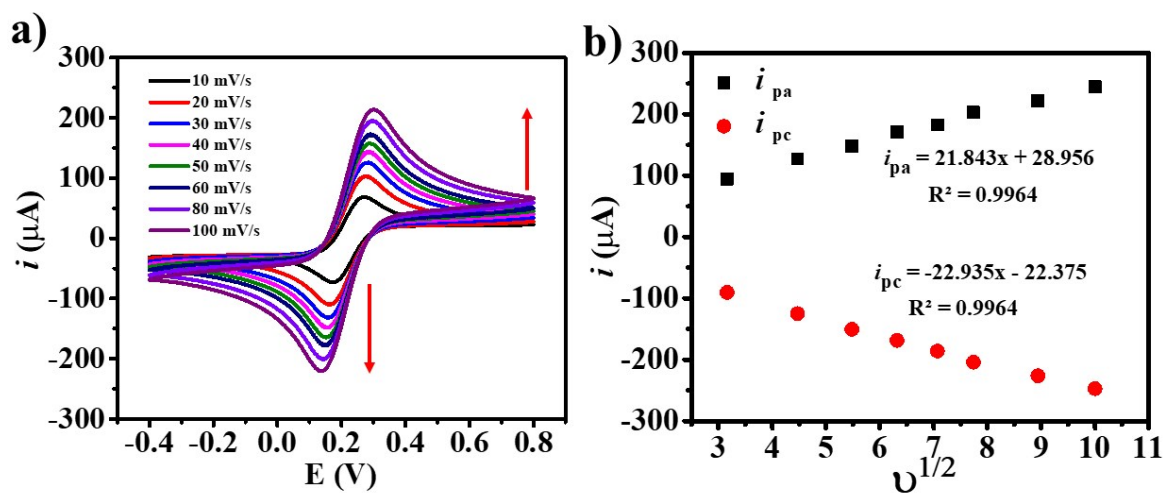

**Fig. S2** (a) CVs of AuNPs/GQDs/GO modified SPCE in contact with 0.10 M KCl solution containing 5.0 mM  $[\text{Fe}(\text{CN})_6]^{4-/3-}$  at different scan rates and (b) the oxidation ( $i_{pa}$ ) and reduction ( $i_{pc}$ ) peak currents increased linearly with the square root of scan rate.

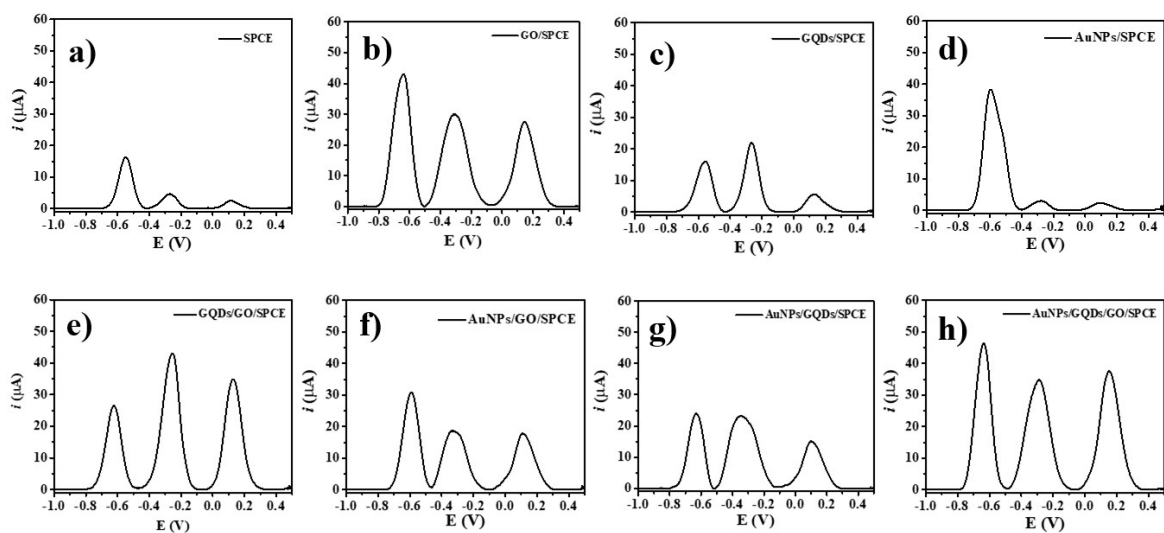

**Fig. S3** Effect of different modified 3SPCEs on response signal intensities of the three redox probes.

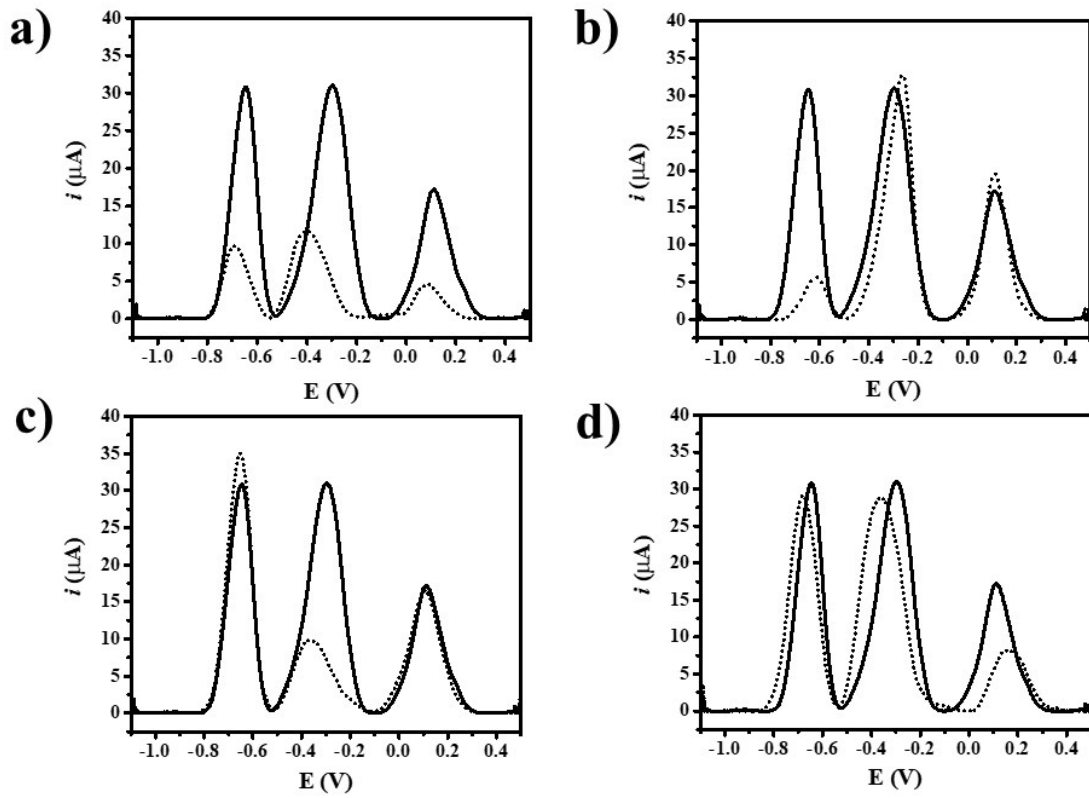

**Fig. S4** SWV curves for the miRNA biosensor in the simultaneous detection of three miRNA targets (dash line) in solution with presence of (a) three miRNA targets, (b) only miRNA-21, (c) only miRNA-155, and (d) only miRNA-210. Solid lines represent blank.
